# Supplementary material for: MitoQ supplementation augments acute exercise-induced increases in muscle PGC1α mRNA and improves training-induced increases in peak power independent of mitochondrial content and function in untrained middle-aged men
Source: PubMed Central journal article supplement — Redox Biol. 2022 May 20;53:102341. doi: 10.1016/j.redox.2022.102341 (PMC9142706; doi:10.1016/j.redox.2022.102341), 2022-05-20
Supplement: mmc1.pdf [file mmc1.pdf]

## Supplementary Figure 1

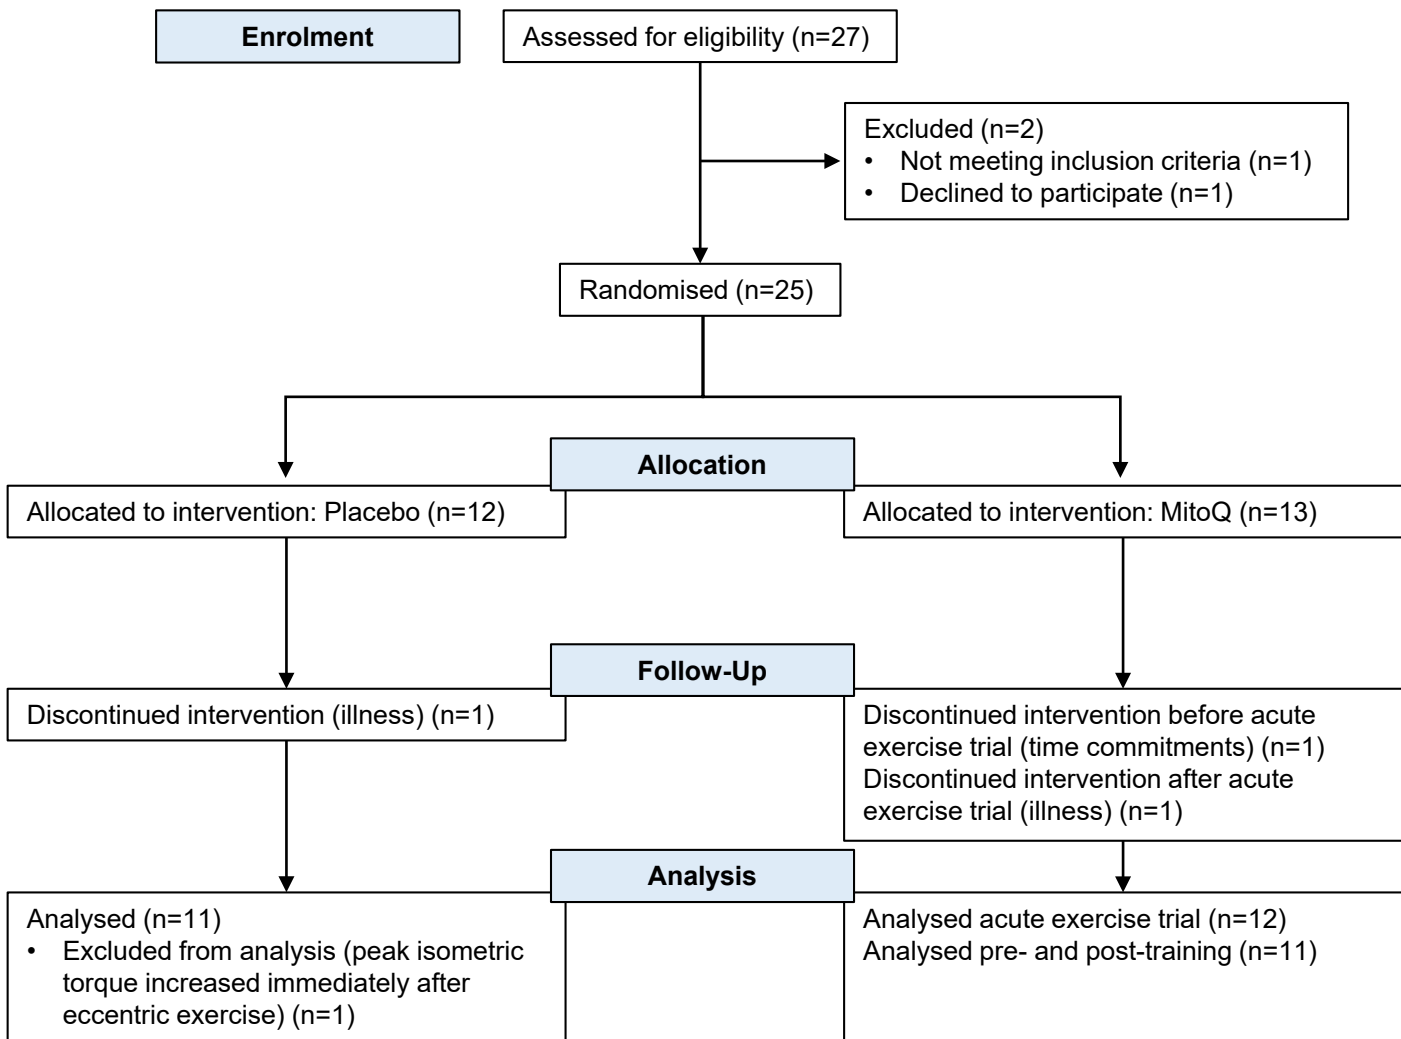

**Supplementary Figure 1. CONSORT flow chart.** This figure shows the flow of patients through the trial according to the criteria recommended in the CONSORT Guidelines.

# Supplementary Figure 2

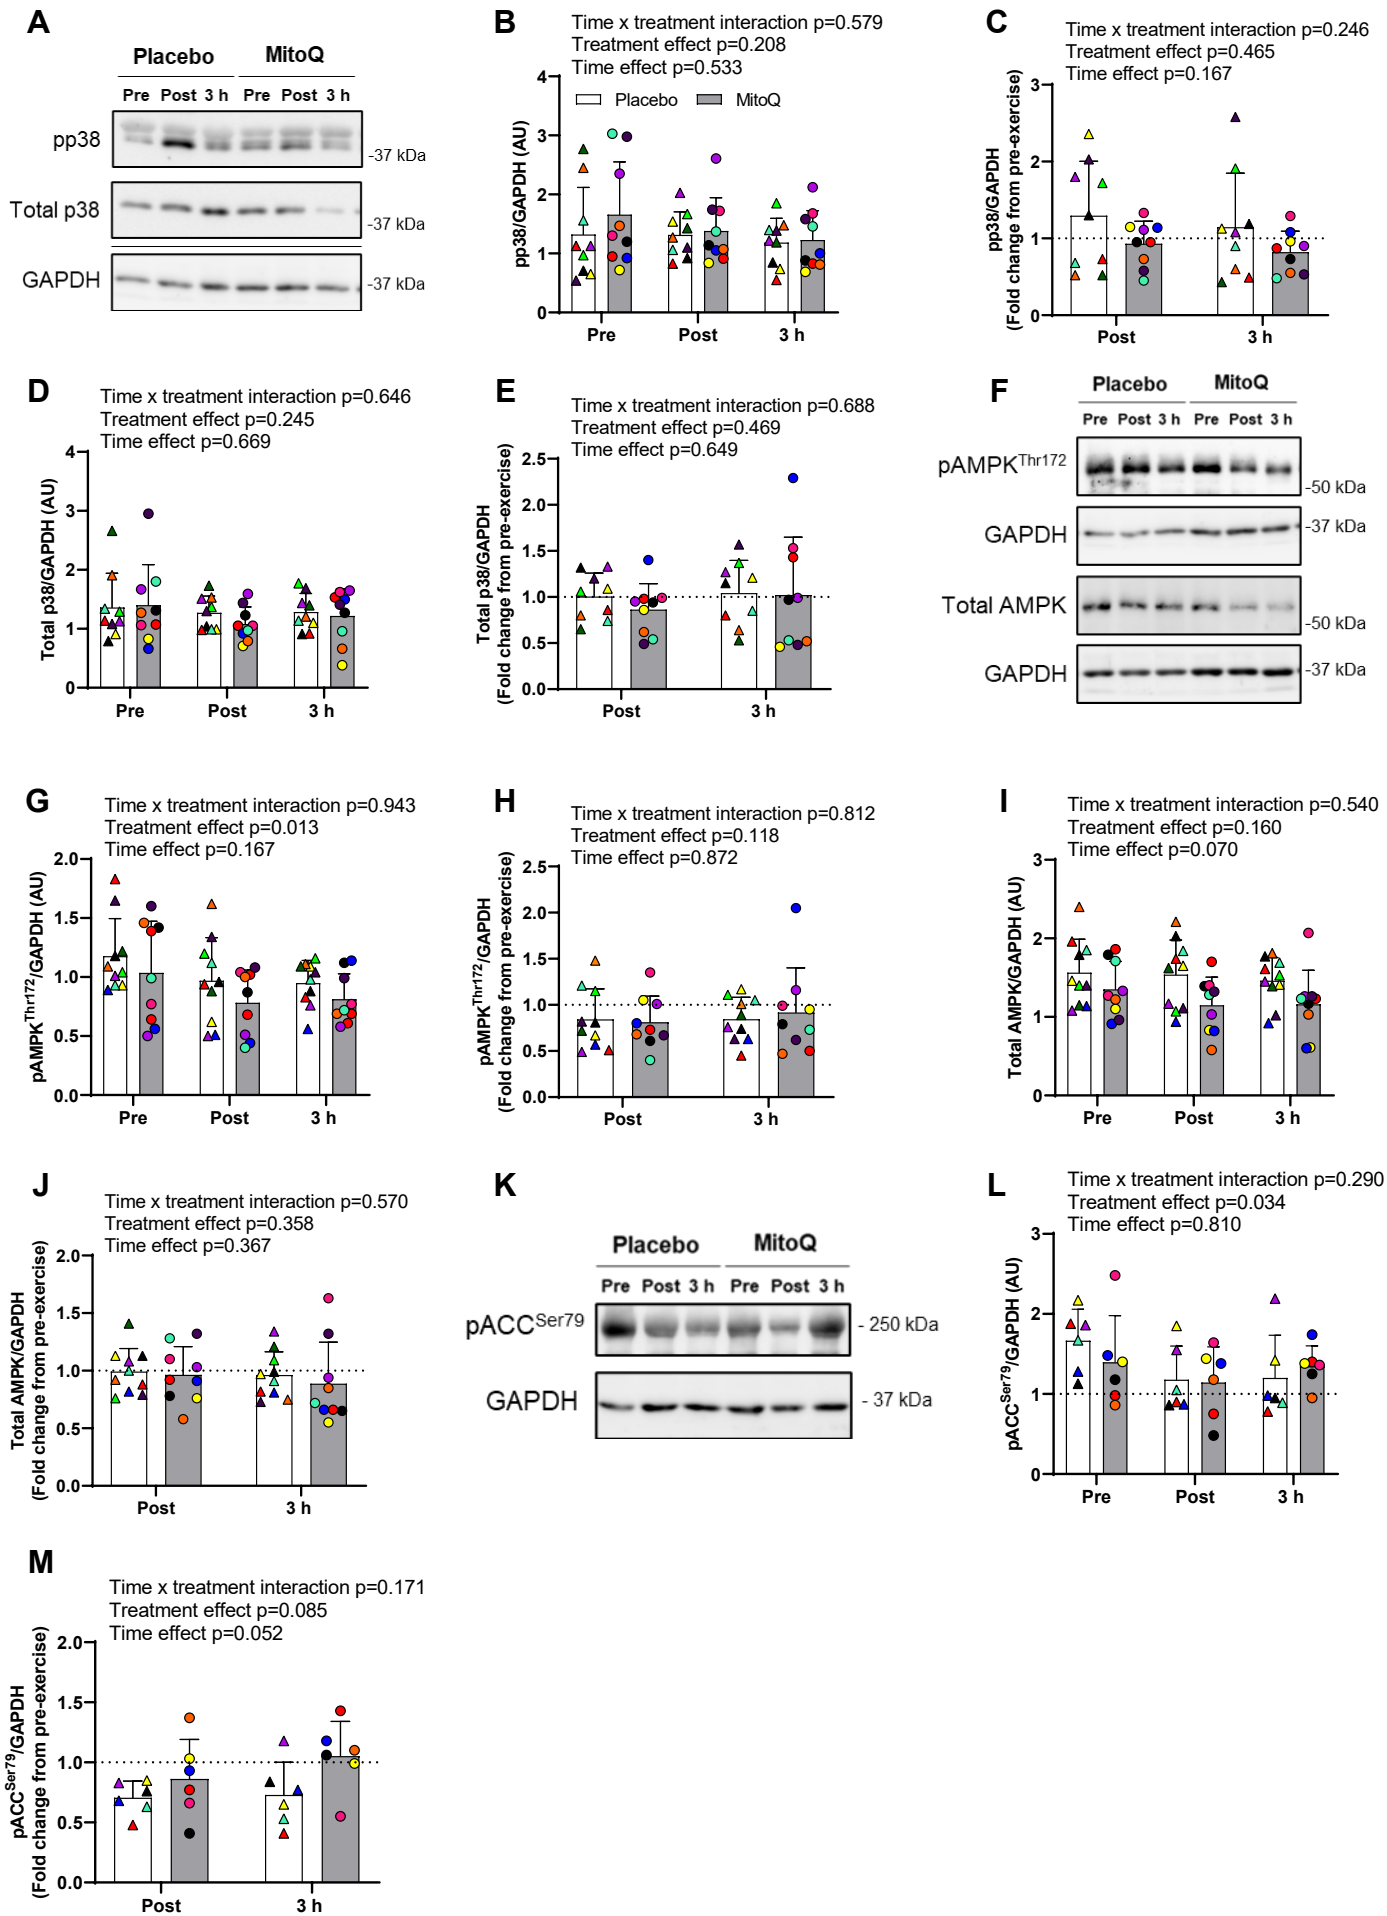

**Supplementary Figure 2. The effect of exercise and MitoQ supplementation on skeletal muscle p38 MAPK, AMPK, and ACC phosphorylation.** A) Representative blot of phosphorylated p38 MAPK (pp38) and total p38 MAPK protein expression B) pp38 protein expression before exercise (Pre) and immediately (Post) and 3 hours after exercise (3 h). C) pp38 protein expression represented as fold change from pre-exercise. D) Total p38 protein expression. E) Total p38 protein expression presented as fold change from pre-exercise. F) Representative blot of phosphorylated AMPK<sup>Thr172</sup> (pAMPK<sup>Thr172</sup>) and total AMPK protein expression. G) pAMPK<sup>Thr172</sup> protein expression. H) pAMPK<sup>Thr172</sup> protein expression represented as fold change from pre-exercise. I) Total AMPK protein expression. J) Total AMPK protein expression presented as fold change from pre-exercise. K) Representative blot of phosphorylated ACC<sup>Ser79</sup> (pACC<sup>Ser79</sup>) and total ACC protein expression. L) pACC<sup>Ser79</sup> protein expression. M) pACC<sup>Ser79</sup> protein expression represented as fold change from pre-exercise. N) Total ACC protein expression. O) Total ACC protein expression presented as fold change from pre-exercise. Skeletal muscle biopsies were taken following 10 days of MitoQ supplementation. Triangles and circles represent individual values. Main two-way repeated-measures ANOVA effects are given in figures. Values are presented as means  $\pm$  SD.

### Supplementary Figure 3

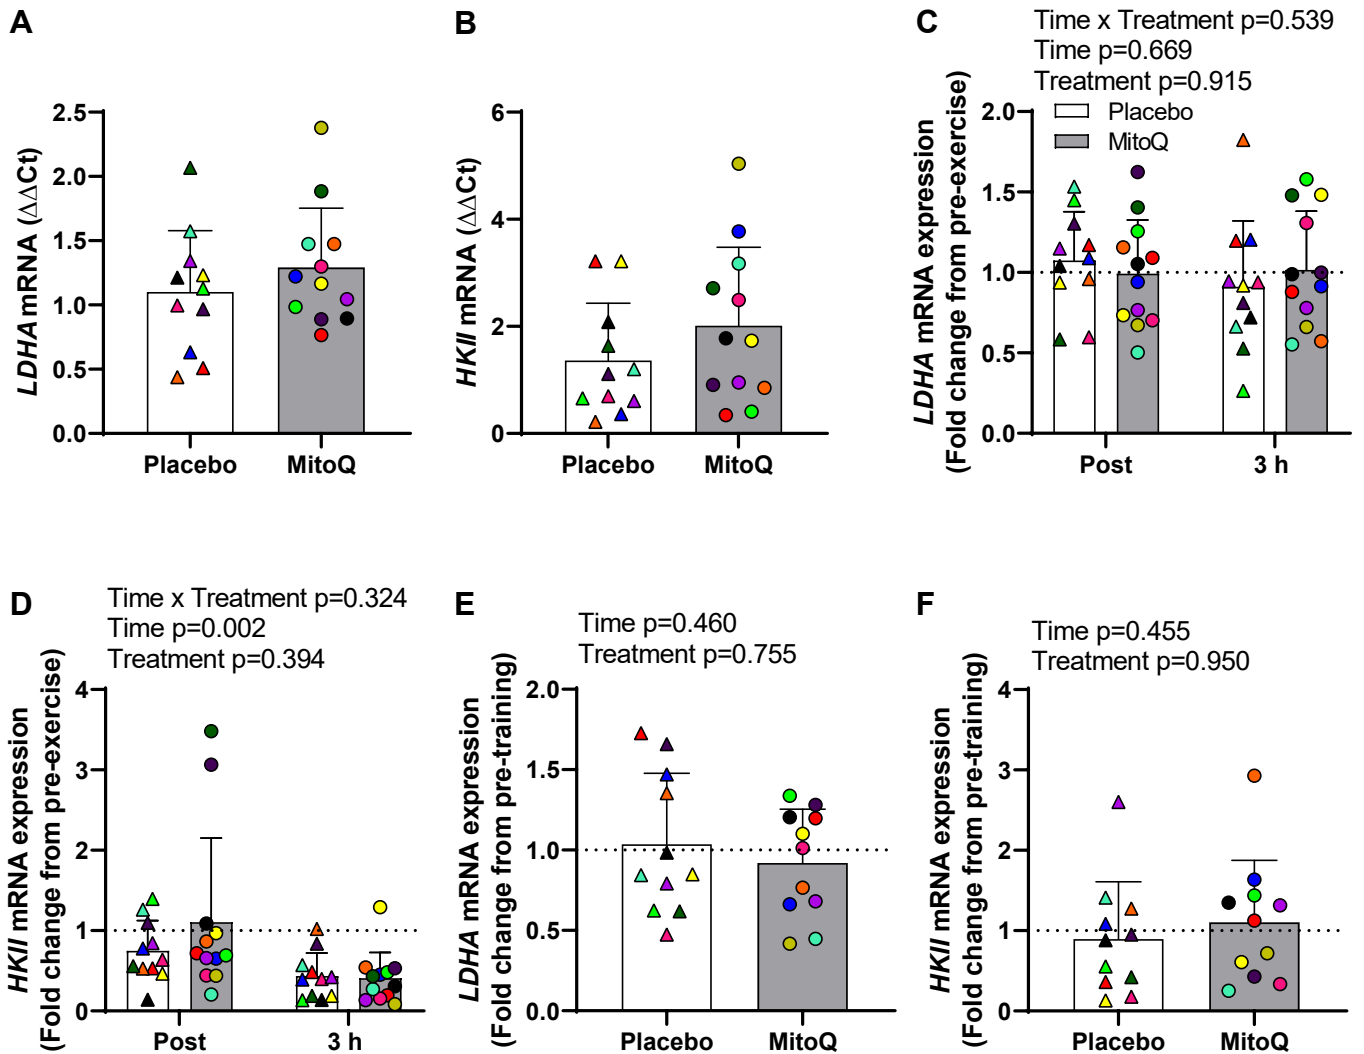

**Supplementary Figure 3. The effect of MitoQ supplementation on mRNA expression of genes involved in anaerobic metabolism.** Baseline skeletal muscle A) *LDHA* and B) *HKII* mRNA expression following 10 days of MitoQ or placebo supplementation. Skeletal muscle C) *LDHA* and D) *HKII* mRNA expression immediately (Post) and 3 hours (3 h) after exercise presented as fold change from pre-exercise. Skeletal muscle E) *LDHA* and F) *HKII* mRNA expression after 3 weeks of training presented as fold change from pre-training. Triangles and circles represent individual values. Differences in skeletal muscle *LDHA* and *HKII* mRNA expression at baseline were analysed using unpaired Student's t-test. Main two-way repeated measures ANOVA effects are shown in figures C-F. Data are presented as mean  $\pm$  SD. *LDHA*; Lactate Dehydrogenase A, *HKII*; Hexokinase II.
