# Supplementary material for: MitoQ supplementation augments acute exercise-induced increases in muscle PGC1α mRNA and improves training-induced increases in peak power independent of mitochondrial content and function in untrained middle-aged men
Source: PubMed Central journal article supplement — Redox Biol. 2022 May 20;53:102341. doi: 10.1016/j.redox.2022.102341 (PMC9142706; doi:10.1016/j.redox.2022.102341), 2022-05-20
Supplement: mmc2.pdf [file mmc2.pdf]

**Supplementary Table 1. Primer sequences**

**Forward Primers**

|                       |                                                                                                                                                                    |
|-----------------------|--------------------------------------------------------------------------------------------------------------------------------------------------------------------|
| 16.2 kb mito fragment | TGA GGC CAA ATA TCA TTC TGA GGG GC                                                                                                                                 |
| 120 bp mito fragment  | CTC TCA CTG CCC AAG AAC TAT C                                                                                                                                      |
| PPARGC1A              | CTGCTTCGTCGTCAAAAACAGCTTGACTGGGATGACCGAAGTGTCTTCCCTCAAGACCTAAGCGACAGCG<br>TGACCTTGTTC                                                                              |
| TFAM                  | CATCGCTCCGGTGGATGAGGCAGTGACCCGACCCCAATCATCTCTCTTTCTTGGTGTGAGAAGATGCTC<br>ATTGCTCGCTTGCCAACTAGGCTAAATACCCTGGTAGCCAACATTCTGCACAATTCTGCGGGTTAGCAGGAAG<br>GTTAGGGAAC   |
| COX4                  | GAAGAGAAGTAAGCCGAGGGCGTCTTTGATTGTGTAGTAAGGGTGAAGGCTGTTGAGATTATTGAGCTTCA<br>TCATGACCAGAAG                                                                           |
| CYTB                  | AGGCGATGGCGGTGAGTGTGAGGATAGGCAAAAAGGCGGCCAAAGACGCCTATCTCCAGTTTATGATCGGGA<br>AACT                                                                                   |
| CAT                   | GGAGACTACGACGCAAAACCAGCACCCCGTCTCCGCGACTACTTTATAGGCCGAACCTAACTCCTCGTACAT<br>TCCTATTGTTTTC                                                                          |
| SOD1                  | AGGGCAGGTCGGGGAGGCTGTGCTTCTGCCTGGAGCCAATTTGGTTTTACTCCCCTCGATTATGCGGAGT<br>GGTGTTCCTCCCTCGTAGGTTTAGAGGAAACACCCTCATAGATGAAAACCTTTCCGGTTATATCTATCATTTA<br>CTTGACACCCT |
| SOD2                  | GGCTTCCTGAAAAGCAGTCTTGCTCTCGATCTGCTTACCATCTTGGCACCCTGTGGACGGCAACTCAGAGA<br>TAACGCATAT                                                                              |
| GPX1                  | GCAAGGAGCTGGGGCTCATACTTGATATCCTGAACCCTGGAGAGTGAATCTAGGACGCAAACTCACTTGAAG<br>AAGTAAAAGCGAG                                                                          |
| TRX1                  | TCTTGTCATGAACCTCAGAAACATCAGGCAACTCATGGTTGGAATTCAGCACATTTGGAATGATGTGACTGGG<br>AATAAGACGACG                                                                          |
| C1ORF43               | TGAGCACACAGAGGGCTACAATGTGATGGCCTCCCATCTCCTTCATCACACCACGCGATGACGTTGTCGTAAG<br>AGTCCGATAATCT                                                                         |
| EMC7                  | AATGTCTCCTTTCCGGATGGTTCGATACGCTCCAGGAAGTACGGCTTAACTGAGGCTGTTAAAGCTGTAGCA<br>ACTCTCCACGA                                                                            |
| HPRT1                 | TCTTCAAGCCATCCTGTGT                                                                                                                                                |
| VEGF                  | GTGATGTGCAGCTGATCAAGACT                                                                                                                                            |
| 36B4                  | GGCTATCCAGCGTACTCAA                                                                                                                                                |
| B2M                   |                                                                                                                                                                    |

**Reverse Primers**

|                       |                                                                                                                                                      |
|-----------------------|------------------------------------------------------------------------------------------------------------------------------------------------------|
| 16.2 kb mito fragment | TTT CAT CAT GCG GAG ATG TTG GAT GG                                                                                                                   |
| 120 bp mito fragment  | GGG CTT TAG GGA GTC ATA AGT G                                                                                                                        |
| PPARGC1A              | CGAAAGCCATGACCTCCGATCACTCGGAGAATTGTTCACTACTGAAATCACTGTCCCTCAGTTCACCGGTCTT<br>GT                                                                      |
| TFAM                  | CGAAAGCCATGACCTCCGATCACTCCAGGGCACTCAGCACGCCCCACATGCTTCCGGAGAAAACGC<br>CGAAAGCCATGACCTCCGATCACTCAAGTCTTCGCTCTTCAACAACATGAGCTCGTACACACACAGAGGTG<br>GAA |
| COX4                  | CGAAAGCCATGACCTCCGATCACTCTCGCTAGGAGTCTGGTGAAGAATAGTGTAAATGTCATTAAGGAGAG<br>AAG                                                                       |
| CYTB                  | CGAAAGCCATGACCTCCGATCACTCCTCGAGCACGGTAGGGACAGTTCACAGGTATATGAAGATAATTGGGT<br>CCC                                                                      |
| CAT                   | CGAAAGCCATGACCTCCGATCACTCCCTGGTTCGAGGACTGCAACGGAAAACCCAGACGCTGCA<br>CGAAAGCCATGACCTCCGATCACTCCAGCTGCATGATCTGCGCGTTGATGTGAGGTTCCAGGGCGCCGTAGT<br>CGT  |
| SOD1                  | CGAAAGCCATGACCTCCGATCACTCCAGTCAACAGGACCAGCACCCATCTCGAGGTGGTATTTTCTGTAAGAT<br>CA                                                                      |
| SOD2                  | CGAAAGCCATGACCTCCGATCACTCCAGTCAACAGGACCAGCACCCATCTCGAGGTGGTATTTTCTGTAAGAT<br>CA                                                                      |
| GPX1                  | CGAAAGCCATGACCTCCGATCACTCCAGTCAACAGGACCAGCACCCATCTCGAGGTGGTATTTTCTGTAAGAT<br>CA                                                                      |
| TRX1                  | CGAAAGCCATGACCTCCGATCACTCCAGTCAACAGGACCAGCACCCATCTCGAGGTGGTATTTTCTGTAAGAT<br>CA                                                                      |
| C1ORF43               | CGAAAGCCATGACCTCCGATCACTCCTGGGTTTCCAGTTGTAGTAGTCTAGCATCATCATCT<br>CGAAAGCCATGACCTCCGATCACTCGTTTTACTGCTGCCGCTGCTAGATTTGCCAGATGATTTTGAAGAGAAG<br>AG    |
| EMC7                  | CGAAAGCCATGACCTCCGATCACTCCAGTCAACAGGACCAGCACCCATCTCGAGGTGGTATTTTCTGTAAGAT<br>CA                                                                      |
| HPRT1                 | CGAAAGCCATGACCTCCGATCACTCCAGTCAACAGGACCAGCACCCATCTCGAGGTGGTATTTTCTGTAAGAT<br>CA                                                                      |
| VCP                   | CGAAAGCCATGACCTCCGATCACTCGTTTTCCACCCTTTGAACTCCACAGCACGCATCCACCACGGACAAG<br>AAA                                                                       |
| VEGF                  | CTTCTTTGGTCTGCATTC                                                                                                                                   |
| 36B4                  | GATGACCAGCCAAAGGAGA                                                                                                                                  |
| B2M                   | GATGAAACCCAGACACATAGCA                                                                                                                               |

**Supplementary Table 2. Thermal cycler conditions for amplification of long and short mitochondrial fragments**

| <b>Cycle step</b>    | <b>Long mitochondrial fragment</b> | <b>Short mitochondrial fragment</b> |
|----------------------|------------------------------------|-------------------------------------|
| Initial denaturation | 98°C for 30 s                      | 95°C for 5 min                      |
| Amplification:       | 18 cycles of:                      | 17 cycles of:                       |
| Denaturation         | 98°C for 5 s                       | 95°C for 30 s                       |
| Annealing            | 60°C for 10 s                      | 55°C for 30 s                       |
| Extension            | 72°C for 4 min 30 s                | 72°C for 45 s                       |
| Final extension      | 72°C for 5 s                       | 72°C for 7 min                      |
| Hold                 | 4°C                                | 4°C                                 |
